# Supplementary material
Source: PubMed Central journal article supplement (PMC10902184)
Supplement: NIHMS1927070-supplement-Supp1.pdf [file NIHMS1927070-supplement-Supp1.pdf]

## **Supplemental Materials**

**Report from the Society of Magnetic Resonance Angiography: Clinical applications of 7T  
Neurovascular MR in the assessment of intracranial vascular disease**

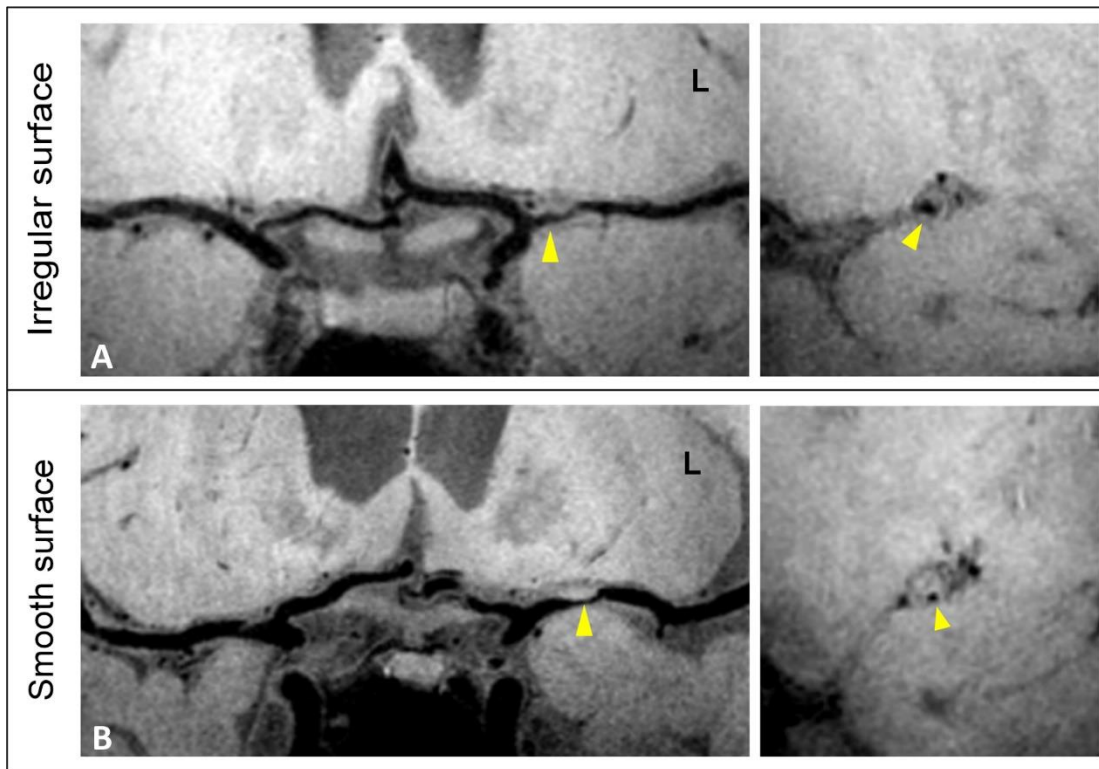

**Supplemental Figure 1.** Coronal and sagittal T1-weighted intracranial vessel wall MR (A) show atherosclerotic plaque involving the proximal left M1 MCA with associated irregular plaque surface (arrowheads). Coronal and sagittal T1-weighted intracranial vessel wall MR (B) shows atherosclerotic plaque involving the mid left M1 MCA with smooth plaque surface (arrowheads).

|                               | 7-Tesla | 3-Tesla |
|-------------------------------|---------|---------|
| Spatial resolution            | ++++    | ++      |
| Contrast-to-noise ratio       | ++++    | +       |
| Signal-to-noise ratio         | +++     | +       |
| Small lesion depiction        | +++     | +       |
| Enhanced flow characteristics | +++     | ++      |
| Susceptibility artifacts      | ++++    | ++      |
| Field inhomogeneity           | +++     | +       |
| Specific absorption rate      | +++     | ++      |
| Acquisition time              | +++     | ++      |

**Supplemental Table 1.** Differential advantages and drawbacks of 7-Tesla MRI as compared to 3-Tesla MRI.

| Challenges of 7T Neurovascular Imaging               | Mitigation Strategies                                                                                                |
|------------------------------------------------------|----------------------------------------------------------------------------------------------------------------------|
| Field Inhomogeneity                                  | Improved shimming systems                                                                                            |
| Increased susceptibility                             | Increasing spatial resolution, shortened TE                                                                          |
| Long acquisition times with increased patient motion | Imaging acceleration algorithms (Compressed sensing, parallel imaging, and AI reconstructions) to shorten scan times |
| Increased specific absorption rate (SAR)             | Modified radiofrequency transmit coils, pulse setting adjustments                                                    |

**Supplemental Table 2.** Challenges of 7T Neurovascular MR and mitigation strategies to limit these obstacles.

| Imaging Techniques | Immediate Use                                                                                                                                                                                                                                                                                            | Potential Future Applications                                                                                                                                                                                                                                                               |
|--------------------|----------------------------------------------------------------------------------------------------------------------------------------------------------------------------------------------------------------------------------------------------------------------------------------------------------|---------------------------------------------------------------------------------------------------------------------------------------------------------------------------------------------------------------------------------------------------------------------------------------------|
| TOF-MRA            | <ul style="list-style-type: none"> <li>• Subtle lumen pathology detection (stenosis/irregularity, small or micro-aneurysm)</li> <li>• Collateral assessment in arterial occlusion</li> <li>• High-flow AVM characterization</li> </ul>                                                                   | <ul style="list-style-type: none"> <li>• Evaluation of lenticulostriate artery pathology for small vessel disease and association with cognitive function</li> <li>• Improved anatomic detail for computational fluid dynamic simulations and 3D segmentation for AI development</li> </ul> |
| Vessel Wall MR     | <ul style="list-style-type: none"> <li>• Improved detection of intracranial arterial wall lesions (atherosclerosis, vasculitis)</li> <li>• Improved plaque surface evaluation and plaque burden assessment</li> <li>• Determination of atherosclerotic ostial involvement for stroke etiology</li> </ul> | <ul style="list-style-type: none"> <li>• Improved intracranial arterial disease morphological and composition characterization (atherosclerosis, cerebral aneurysm)</li> <li>• Small vessel lesion involvement (vasculitis, atherosclerosis, etc.)</li> </ul>                               |
| 4D flow            | <ul style="list-style-type: none"> <li>•</li> </ul>                                                                                                                                                                                                                                                      | <ul style="list-style-type: none"> <li>• Improved flow analysis in intracranial arteries and venous sinuses</li> <li>• Small vessel hemodynamics in association with dementia and stroke risk</li> <li>• Cerebral aneurysm hemodynamics and association with instability</li> </ul>         |
| SWI                | <ul style="list-style-type: none"> <li>• Venous anatomy and pathology assessment</li> <li>• Vascular malformation detection and characterization</li> </ul>                                                                                                                                              | <ul style="list-style-type: none"> <li>• Cerebral small vessel disease characterization</li> <li>• Microvascular changes in small artery vasculitis</li> </ul>                                                                                                                              |

**Supplemental Table 3.** Current uses and potential future uses for 7T Neurovascular MR techniques.
